The role of acid-sensing ion channels (ASICs) in epithelial Na<sup>+</sup> uptake in adult zebrafish (*Danio rerio*).

Agnieszka K. Dymowska, David Boyle, Aaron G. Schultz, and Greg G. Goss\*

Department of Biological Sciences, University of Alberta, Edmonton, Alberta, Canada T6G 2E9

\*Corresponding author: Email: [greg.goss@ualberta.ca](mailto:greg.goss@ualberta.ca)

Key words: Gill, acid-sensing ion channels, zebrafish, sodium uptake, ionoregulation

## ABSTRACT

Acid-sensing ion channels (ASICs) are epithelial  $\text{Na}^+$  channels gated by external  $\text{H}^+$ . Recently, it has been demonstrated that ASICs play a role in  $\text{Na}^+$  uptake in freshwater rainbow trout. The current paper investigated the potential involvement of ASICs in  $\text{Na}^+$  transport in another freshwater fish species, the zebrafish (*Danio rerio*). Using molecular and histological techniques we found that *asic* genes and the ASIC4.2 protein are expressed in the gill of adult zebrafish. Immunohistochemistry revealed that mitochondrion-rich cells positive for ASIC4.2 do not co-localize with  $\text{Na}^+/\text{K}^+$ -ATPase (NKA)-rich cells, but co-localize with cells expressing vacuolar-type  $\text{H}^+$ -ATPase (VHA). Furthermore, pharmacological inhibitors of ASIC and  $\text{Na}^+/\text{H}^+$ -exchanger (NHEs) significantly reduced uptake of  $\text{Na}^+$  in adult zebrafish exposed to low  $\text{Na}^+$  media, but did not cause the same response in individuals exposed to ultra-low  $\text{Na}^+$  water. Our results suggest that in adult zebrafish ASICs play a role in branchial  $\text{Na}^+$  uptake in media with low  $\text{Na}^+$  concentrations and that mechanisms used for  $\text{Na}^+$  uptake by zebrafish may depend on the  $\text{Na}^+$  concentration in the acclimation media.

## INTRODUCTION

In fresh water (FW), teleost fishes experience the continuous diffusive loss of ions to a more hypo-osmotic external environment. To maintain homeostasis, FW fishes must take up ions including  $\text{Na}^+$ ,  $\text{Cl}^-$  and  $\text{Ca}^{2+}$  from the surrounding water and/or reduce the diffusive ion loss by maintaining low paracellular permeability. Uptake of ions is achieved by specialized ionocytes called mitochondrion-rich cells (MRCs) that are located on the gill epithelium (see reviews by Dymowska et al., 2012; Evans et al., 2005; Hwang et al., 2011). However, despite considerable research efforts, the mechanisms of ion acquisition and identity of the transporters involved in FW ion uptake are still not fully understood.

The most favoured current model of  $\text{Na}^+$  uptake in FW fish gills proposes  $\text{Na}^+$  uptake to occur via a  $\text{Na}^+/\text{H}^+$  exchanger (NHE) (reviewed by Hwang et al., 2011). This model is supported by empirical evidence from several FW fish species (e.g. Bradshaw et al., 2012; Esaki et al., 2007; Hirata et al., 2003; Yan et al., 2007), however a limitation of this model is the questionable ability of the electroneutral NHE to function in low  $\text{Na}^+$  waters ( $\text{Na}^+ < 0.1$  mM) and/or low pH ( $\text{pH} < 5$ ), where gradients for  $\text{Na}^+$  and  $\text{H}^+$  would be reversed (Avella and Bornancin, 1989; Parks et al., 2008). Recently, the NHE model has been extended by the addition of an ammonia ( $\text{NH}_3$ )-transporting Rhesus (Rh) protein (Nakada et al., 2007; Nawata et al., 2007), whereby NHE2/3 and Rh protein form a metabolon, which locally decreases  $\text{H}^+$  concentration in the boundary layer, and facilitates NHE function in acidic environments (Wright and Wood, 2009). However, while the NHE/Rh metabolon model provides a solution for constraints at low pH, it cannot alleviate the thermodynamic constraints imposed by low  $\text{Na}^+$  environments (see “rainbow trout” section in (Dymowska et al., 2012).

An alternative model for  $\text{Na}^+$  uptake, where  $\text{Na}^+$  transport is mediated by an apical channel that works in concert with vacuolar-type  $\text{H}^+$ -ATPase (VHA), better fits gill  $\text{Na}^+$  uptake in low  $\text{Na}^+$  environments, as it would theoretically not be limited by external ion concentrations (Avella and Bornancin, 1989). Support for this model comes from studies that have shown decreased  $\text{Na}^+$  uptake in whole organism and *in vitro* preparations of isolated MRCs exposed to bafilomycin, a selective VHA inhibitor (Bury and Wood, 1999; Goss et al., 2011; Reid et al., 2003). Additionally, VHA was localized to the apical region of the MRCs in the rainbow trout (Sullivan et al., 1995; Wilson et al., 2000). However, until recently, the putative  $\text{Na}^+$  channel had not been identified and as a result the VHA/ $\text{Na}^+$  channel model has received less support from researchers in recent years. Recently, we have demonstrated that

acid-sensing ion channels (ASICs) play a role in  $\text{Na}^+$  acquisition in the gill epithelium of rainbow trout (Dymowska et al., 2014). ASICs are  $\text{H}^+$ -gated  $\text{Na}^+$  channels that belong to the epithelial  $\text{Na}^+$  channel/degenerin (ENaC/DEG) superfamily (for review see Holzer, 2009). In mammals, seven different ASIC subunits (ASIC1a, 1b, 1c, 2, 4a, 4b, 5) have been identified and are encoded by four different genes, while in zebrafish, a fish species with the most extensive functional characterization of ASICs, six subunits are present (ASIC 1.1, 1.2, 1.3, 2, 4.1, and 4.2) and each subunit is encoded by a different gene (Grunder et al., 2000; Paukert et al., 2004; Sakai et al., 1999; Waldmann and Lazdunski, 1998). In the recent study by Dymowska et al. (2014) *asic1* and *asic4* were cloned from the gill cDNA of the adult rainbow trout, and using immunohistochemistry ASIC4 was apically localized to MRCs rich in  $\text{Na}^+/\text{K}^+$ -ATPase (NKA) (Dymowska et al., 2014). Additionally, ASIC-specific inhibitors 4', 6-diamidino-2-phenylindole (DAPI) and diminazene (Chen et al., 2010), were demonstrated to decrease  $\text{Na}^+$  uptake in a dose-dependent manner in juvenile rainbow trout acclimated to a low  $\text{Na}^+$  ( $\sim 50 \mu\text{M}$ ) environment (Dymowska et al., 2014).

In the study presented here, we investigated whether ASICs are involved in branchial  $\text{Na}^+$  transport in another model organism for ion transport research, the zebrafish (*Danio rerio*). Zebrafish have become an increasingly popular model organism for use in studies on FW fish ionoregulation (e.g., Boisen et al., 2003; Hwang, 2009; Kumai and Perry, 2011; Shih et al., 2012a; Yan et al., 2007) due to the availability of their genetic databases, as well as ease of husbandry, gene expression analysis and genomic manipulation (Lawrence, 2011). Unlike trout, which have two distinct MRC sub-types, zebrafish have been demonstrated to have at least four types of MRC in the gill and skin epithelia: VHA-rich cells (HR cells), NKA-rich cells (NaR cells), cells expressing  $\text{Na}^+/\text{Cl}^-$  co-transporter (NCC cells), and  $\text{K}^+$ -secreting cells (KS cells), with HR cells proposed to be the main site for  $\text{Na}^+$  uptake (for review see Hwang et al., 2011). The current model for zebrafish HR cell also places on the apical side an unidentified epithelial  $\text{Na}^+$  channel (Dymowska et al., 2012; Hwang et al., 2011). Based on the previous findings in rainbow trout (Dymowska et al., 2014), we hypothesized that the role of the epithelial  $\text{Na}^+$  channel in adult zebrafish gill is assumed by proteins from the ASIC family.

The objective of our study was to verify if ASICs are present in the gills of the adult zebrafish and then to determine whether ASICs are involved in  $\text{Na}^+$  uptake at the whole animal level using flux experiments. We measured  $\text{Na}^+$  uptake using radiotracer ( $^{22}\text{Na}^+$ ) analysis in zebrafish exposed to ultra-low ( $\text{Na}^+ \sim 50 \mu\text{M}$ ;  $\text{pH}=6$ ) and low ( $\text{Na}^+ \sim 500 \mu\text{M}$ ,

pH=8.5) Na<sup>+</sup>-containing media in the presence and absence of common Na<sup>+</sup> uptake pharmacological inhibitors, including DAPI. Na<sup>+</sup> concentrations in both exposure media were chosen to span the theoretical limits of the NHE model (Parks et al., 2008). Expression levels of *asics* mRNA were also evaluated in the ultra-low, low and high (Na<sup>+</sup>~1400μM; pH=7) Na<sup>+</sup> exposures to examine changes in expression associated with a change in environment.

## RESULTS

### Pharmacological inhibition of Na<sup>+</sup> uptake

To determine if DAPI, an ASIC selective inhibitor (Chen et al., 2010) displayed a similar dose-response inhibition effect on Na<sup>+</sup> uptake in zebrafish to that of rainbow trout, flux experiments using <sup>22</sup>Na<sup>+</sup> were performed on adult zebrafish exposed to low-Na<sup>+</sup> media (~500 μM Na<sup>+</sup>; Table 1). After 90 min zebrafish showed reduced Na<sup>+</sup> uptake with increasing concentration of DAPI (Fig. 1). The maximal (but not complete) inhibition of Na<sup>+</sup> uptake rate was observed at 10 μM of DAPI and was equal to 59% of control Na<sup>+</sup> uptake. Increasing DAPI concentration to 100 μM did not result in further decreases in Na<sup>+</sup> uptake.

To determine the relative involvement of Na<sup>+</sup> transporters in Na<sup>+</sup> uptake, DAPI and two other Na<sup>+</sup> inhibitors – ethyl-iso-propyl-amiloride (EIPA), which has a high selectivity for NHE (Ito et al., 2014; Kleyman and Cragoe, 1988), and amiloride, which inhibits both NHE and Na<sup>+</sup> channels (Kleyman and Cragoe, 1988), were tested at low-Na<sup>+</sup> (511±25 μM) and ultra-low Na<sup>+</sup> (49.5 ± 0.5 μM) conditions (Fig. 2). Zebrafish acclimated to low-Na<sup>+</sup> media exhibited a 55% decrease in Na<sup>+</sup> uptake in the presence of DAPI (10 μM) (Fig. 2A), which was in agreement with the dose-response experiment (Fig. 1). Amiloride (200 μM), also reduced Na<sup>+</sup> uptake by 55%, whereas EIPA (100 μM) had no significant effect, although a consistent trend towards increase in Na<sup>+</sup> uptake was noted (Fig. 2B). In contrast, when zebrafish were acclimated to ultra-low Na<sup>+</sup> media, the control rate of flux was reduced by ~50% (Fig. 2A) and the effect of the pharmacological agents on Na<sup>+</sup> uptake was no longer observed.

### ASICs mRNA expression in the gills

The expression pattern of different *asic* subunits (*asic1.1*, *1.2*, *1.3*, *2*, *4.1*, and *4.2*) mRNAs in the gill tissue of zebrafish acclimated to high-, low- and ultra-low-Na<sup>+</sup> water was examined by RT-PCR. Elongation factor 1α1 (*ef1a1*) was used as an internal control (primers

used are shown in Table 2). All 6 *asic* mRNAs were present in the zebrafish gill tissue regardless of the acclimation media (Fig. 3).

### Immunolocalization of ASIC4.2 in zebrafish gills

With the use of a custom made anti-zebrafish ASIC4.2 antibody, we verified the expression of ASIC4.2 in the gills of zebrafish by immunoprecipitation and a single band corresponding to ~65 kDa (predicted size 62.8 kDa) was identified in the gills of multiple independent animals (Fig. 4). Immunohistological analysis with the anti-ASIC4.2 antibody demonstrated that ASIC4.2 was present in the gills of the adult zebrafish (Fig. 5B, 6B). To determine the cell type to which ASIC4.2 localizes, gills were initially double stained with anti-ASIC4.2 and anti-NKA, a marker of the NaR MRC type in zebrafish (Hwang and Lee, 2007). Cells positive for anti-ASIC4.2 and anti-NKA were observed in the lamellae and interlamellar region of the gills (Fig. 5B,C), however, ASIC4.2 and NKA did not co-localize, suggesting that the ASIC4.2 transporter is not present in NaR MRCs (Fig. 5D). To determine if ASIC4.2 co-localizes with other transporting proteins, gills were also stained with ASIC4.2 and VHA, a marker for HR type MRC. Since both the anti-ASIC4.2 and anti-VHA antibodies were raised in rabbit, staining was carried out on consecutive 4  $\mu$ m sections. Comparison of staining patterns in both sections revealed that many cells positive for anti-ASIC4.2 were also positive for anti-VHA (Fig. 6D), suggesting that ASIC4.2 protein is localized to HR type MRCs.

### DISCUSSION

The objective of the present study was to verify whether ASICs are expressed in the gill tissue of the adult zebrafish, and if they are involved in branchial Na<sup>+</sup> uptake as was shown recently for rainbow trout (Dymowska et al., 2014). Previous studies on ASICs in zebrafish have demonstrated their wide expression in the central and peripheral nervous systems, specifically in brain, retina, intestine and taste buds, where they have been suggested to be involved in nerve transduction and neural communication (Levanti et al., 2011; Paukert et al., 2004; Vina et al., 2013). However, their presence and function in the gill epithelium of zebrafish has never before been tested. The results of the present study demonstrate that multiple subunits of *asics* are expressed in the gill tissue at the mRNA level, with ASIC4.2 protein being localized to MRCs. Pharmacological blockade of Na<sup>+</sup> uptake with ASIC specific inhibitors revealed that ASICs are involved in Na<sup>+</sup> regulation at the whole animal

level. Based on the findings in the present study we propose that ASICs play a role in  $\text{Na}^+$  uptake in the gills of adult zebrafish.

Recently, *asic4* and *asic1* genes have been demonstrated to be expressed in the MRCs from the gill tissue of rainbow trout (Dymowska et al., 2014). Moreover, ASIC4 protein has been found to co-localize with the NKA, a classic marker for the MRCs in rainbow trout, and expressed in the apical region of the cell (Dymowska et al., 2014). In the present study, we observed that similar to rainbow trout, ASIC4.2 was present in the lamellar and interlamellar region of the adult zebrafish gill. However, staining with anti-ASIC4.2, anti-VHA, and anti-NKA antibodies revealed that in zebrafish gill epithelium ASIC4.2 protein co-localized to the cells expressing VHA, but not to the cells that express NKA. We infer that in zebrafish gills, ASIC4 protein is present in the HR type of ionocytes. Previous studies using *in situ* hybridization and immunohistochemistry techniques have demonstrated that HR ionocytes of zebrafish are abundant in NHE3b, and VHA, but in contrast to rainbow trout they are not characterized by high abundance of NKA (Dymowska et al., 2012; Esaki et al., 2007; Lin et al., 2006; Yan et al., 2007); for review on MRC sub-types in FW fish see (Dymowska et al., 2012). Our finding could be further corroborated by co-localization of ASIC4 with NHE3b, however this remains to be determined.

In zebrafish, HR cells are suggested to be the primary site for  $\text{Na}^+$  uptake and  $\text{H}^+$  secretion. This was determined by measurement of  $\text{H}^+$  fluxes in the vicinity of HR cells using scanning ion-selective electrode technique (SIET) (Lin et al., 2006). Currently, the most favoured model for  $\text{Na}^+$  uptake in FW fish, including zebrafish, incorporates an electroneutral NHE since a  $\text{Na}^+$  epithelial channel that could alternatively perform that function in the FW gill epithelium had never previously been identified. However, previous studies in zebrafish adults and larvae demonstrated that bafilomycin, a specific VHA inhibitor, caused a substantial reduction of  $\text{Na}^+$  uptake rates (i.e., Boisen et al., 2003; Kumai and Perry, 2011; Kwong and Perry, 2013). Moreover, knockdown of VHA subunit A (*atp6v1a*) in zebrafish larvae caused a decrease in whole body  $\text{Na}^+$  content in morphants (Horng et al., 2007). Therefore, it is likely that in zebrafish, there exists a secondary, VHA-dependent mechanism for  $\text{Na}^+$  transport. The mechanism by which VHA activity promotes  $\text{Na}^+$  uptake is not yet known, however two alternatives may exist: firstly VHA charges the apical membrane potential thereby increasing the electrochemical gradient for  $\text{Na}^+$  to enter in the cell through ASIC, and secondly that VHA provides a gating signal to ASIC by acidification of the boundary layer, since ASICs are gated by extracellular  $\text{H}^+$  ions that activate several amino

acid residues located in different extracellular domains (Bonifacio et al., 2014; Paukert et al., 2008). One complicating factor is that ASIC4.2 has been demonstrated to be insensitive to extracellular  $H^+$  (Chen et al., 2007). However, there is evidence that ASICs assemble into homo- or heteromeric trimers (Jasti et al., 2007), therefore it is possible that ASIC4.2 forms a channel with other ASIC subunits that show extracellular  $H^+$  gating. Given that we have demonstrated by PCR the presence of all known isoforms of ASIC in the gill of zebrafish, this may be a scenario by which ASIC4.2 could mediate  $Na^+$  transport in conjunction with the VHA.

In the present study, use of the ASIC specific inhibitor, DAPI, verified involvement of ASICs in  $Na^+$  uptake in adult zebrafish. DAPI is a diarylamidine, a class of drugs that have been recently shown to block ASIC  $Na^+$  currents in cultured mice hippocampal neurons, but do not block other epithelial  $Na^+$  channels, such as ENaCs (Chen et al., 2010). Recently, DAPI has also been demonstrated to inhibit  $Na^+$  uptake in rainbow trout exposed to ultra-low ionic strength/low pH water (Dymowska et al., 2014). Moreover, DAPI did not affect the NHE mediated alkalinisation in isolated NHE-expressing (PNA<sup>+</sup>) MR cells from rainbow trout gill, indicating lack of inhibitory effect of DAPI on the trout NHEs (Dymowska et al., 2014). Since DAPI had not been previously employed in  $Na^+$  transport studies in zebrafish, we demonstrated a dose-dependent inhibitory effect on  $Na^+$  uptake rate in animals acclimated to low ionic strength water. However, unlike in rainbow trout, where DAPI almost completely (>90%) inhibited  $Na^+$  uptake (Dymowska et al., 2014), in zebrafish the maximal inhibition of  $Na^+$  flux was ~ 59%, and further increases in DAPI concentration did not cause any further reduction in  $Na^+$  uptake. This result suggests that other DAPI insensitive mechanism(s) for  $Na^+$  transport exists in the zebrafish gill that could account for the remaining 41% of  $Na^+$  transport capacity (see below).

Given the thermodynamic limitations of various transport systems at low and ultra-low  $Na^+$  concentrations, we combined the use of pharmacological agents inhibiting different  $Na^+$  transporters with acclimation media varying in  $Na^+$  concentration. Our results revealed that the effect of the inhibitors on  $Na^+$  uptake differed significantly between the exposure media at the different  $Na^+$  concentrations examined. Zebrafish acclimated to low- $Na^+$  water showed a significant reduction in  $Na^+$  uptake rates in the presence of DAPI and amiloride, while fish exposed to ultra-low  $Na^+$  media were insensitive to the presence of DAPI, amiloride, or EIPA. These results suggest the existence of another mechanism for  $Na^+$  uptake in adult zebrafish that is insensitive to any of the inhibitors used in this study.



It should be noted that our experimental protocol included changes in  $H^+$  and  $Ca^{2+}$  concentration in the exposure media. For the ultra-low  $Na^+$  medium, the lower pH (pH=6) was chosen specifically to impose thermodynamic constraints on the NHE function. In regard to ASICs, it has been previously shown in toadfish ASIC1 that increase of the external  $H^+$  concentration resulted in activation and opening of more channels (Zhang et al., 2006). Similar, extracellular  $Ca^{2+}$  can modulate ASIC dependence on pH, whereby increase in external  $Ca^{2+}$  concentration shifts the pH required for activation of mammalian ASIC1 and ASIC3 to more acidic values (Babini et al., 2002; Immke and McCleskey, 2003). Additionally, one study demonstrated that decrease in external  $Ca^{2+}$  resulted in increased number of open toadfish ASIC1 channels (Zhang et al., 2006). Based on these findings, it has been suggested that  $Ca^{2+}$  and  $H^+$  compete for the same binding site (Kellenberger and Schild, 2015). In our study, we observed reduced  $Na^+$  uptake together with insensitivity to ASIC inhibitor in the ultra-low  $Na^+$  exposure media when compared to low  $Na^+$  conditions, which in our case suggests no apparent stimulatory effects of increases in external  $H^+$  and/or decreased (~4 fold)  $Ca^{2+}$  on ASIC4 mediated  $Na^+$  uptake.

Previous studies using amiloride and EIPA inhibitors in zebrafish have reported conflicting results. Similar to our findings, Boisen and colleagues (2003) demonstrated no effect of either amiloride or EIPA on  $Na^+$  uptake in adult zebrafish acclimated to ultra-low ionic strength water ( $Na^+ \sim 35 \mu M$ ) (Boisen et al., 2003), while other studies (i.e., Kumai and Perry, 2011; Shih et al., 2012b) have demonstrated an effect of EIPA on  $Na^+$  transport in zebrafish larvae. Kumai and Perry (2010), reported a significant reduction in  $Na^+$  uptake by EIPA in 4dpf zebrafish larvae reared in acidic water, while Shih et al. (2012) observed suppressed  $Na^+$  gradients (as measured with a SIET electrode) in larvae acclimated to water with very low  $Na^+$  concentration ( $Na^+ \sim 50 \mu M$ ). Therefore, it is possible that amiloride and EIPA sensitivity of  $Na^+$  uptake in ultra-low  $Na^+$  environments is highly variable between zebrafish developmental stages (embryos to adults).

As mentioned above, the results from fluxes in low and ultra-low  $Na^+$  media with DAPI, amiloride and EIPA suggested the involvement of an alternative  $Na^+$  uptake mechanism to NHE and ASIC. One apparent candidate for this alternative  $Na^+$  uptake mechanism is the  $Na^+/Cl^-$  co-transporter (SLC12A10.2) that has been demonstrated to be apically expressed in the NCC sub-type of MRCs in zebrafish gill and embryonic skin (Hwang and Lee, 2007; Hwang et al., 2011). Translational knockdown of either *nhe3b* or *gcm2*, the latter being a transcription factor that controls differentiation into HR cells (Chang et al., 2009) in zebrafish

larvae, resulted in a substantial increase in the number of NCC type of MRCs in the morphants, which also coincided with an increased  $\text{Na}^+$  content in the *gcm2* morphants (Chang et al., 2013). However, the function of an electroneutral NCC operating as currently described with 1:1 inward directed cotransport to take up  $\text{Na}^+$  from a low or ultra-low environment is highly questionable based on the thermodynamics principles (Hwang et al., 2011; Dymowska et al, 2013).

In conclusion, we have demonstrated the presence of ASIC4.2 in the HR cells located on the zebrafish gill epithelium. Further, using pharmacological blockade with DAPI and amiloride, we demonstrated the involvement of ASIC channels in  $\text{Na}^+$  uptake in zebrafish acclimated to low  $\text{Na}^+$  media. Additionally, we demonstrated that  $\text{Na}^+$  transport in low and ultra-low waters are controlled by a number of different transport systems, and that in ultra-low  $\text{Na}^+$  waters,  $\text{Na}^+$  uptake is insensitive to NHE and ASIC specific inhibitors suggesting that an alternative mechanism is working at these  $\text{Na}^+$  levels.

## MATERIALS AND METHODS

### Animals

Adult zebrafish (wild type strain A/B) were obtained from the University of Alberta Aquatic Facility where they were maintained in 30l flow-through tanks supplied with aerated and de-chlorinated conditioned reverse osmosis (RO) water (high  $\text{Na}^+$  water Table 1; temp. 28°C). Fish were fed twice daily with live brine shrimp (*Artemia salina*; INVE Aquaculture Nutrition) and trout chow (O.S.I. Marine Lab Inc.) and were kept on a 14h light: 10h dark photoperiod. All animals used in the experiments were males due to variability in mass in females caused by the egg mass. The experiments were conducted in compliance with University of Alberta Animal Care protocol AUP00000072.

### Exposure to ultra-low and low $\text{Na}^+$ media

For acclimation experiments zebrafish were transferred to temperature controlled (temp. 28°C) 20 l glass tanks containing either ultra-low or low  $\text{Na}^+$  media (Table 1) for 1 week prior to  $^{22}\text{Na}^+$  uptake experiments. To prepare ultra-low  $\text{Na}^+$  water, ions were added from stock solutions (1M NaCl, 10M  $\text{CaSO}_4$ , 10mM  $\text{MgSO}_4$ ) to reverse osmosis (de-ionized) water, followed by addition of KOH or  $\text{H}_2\text{SO}_4$  to obtain the desired pH level of 6. Alternatively, for low  $\text{Na}^+$  water, City of Edmonton tap water was used. For all exposures approximately 1/2 of the water volume was changed daily to prevent accumulation of

nitrogenous waste. Fish were not fed for the duration of the acclimation. Water ion concentrations were monitored daily using atomic absorption spectrophotometry (Perkin Elmer, Model 3300, CT, USA).

### Pharmacological inhibition of Na<sup>+</sup> uptake

Sodium uptake in zebrafish acclimated to ultra-low or low Na<sup>+</sup> water was measured in 600 ml, aerated flux chambers using radiolabelled <sup>22</sup>Na<sup>+</sup> as described previously (Goss and Wood, 1990). Briefly, fish (n=6 per treatment) were transferred from the acclimation tank to the flux chamber 1h prior to the measurement to enable chamber acclimation. Radiolabelled <sup>22</sup>Na<sup>+</sup> (either 8 µCi/l or 19 µCi/l as appropriate) was then added to each chamber and allowed to mix for 10 min. For experiments involving pharmacological treatment, pharmacological agents were added 10 minutes prior to <sup>22</sup>Na<sup>+</sup> addition. After 10 minutes of mixing of <sup>22</sup>Na<sup>+</sup>, an initial 3 ml water sample was collected while a final flux sample was taken after 90 min of exposure. Zebrafish were then euthanized by overdose with MS-222, removed from the flux chambers, rinsed 3 times in 300 mM NaCl solution, blotted dry, weighed and individually analysed for <sup>22</sup>Na<sup>+</sup> activity by gamma counter (Packard Cobra II, Auto Gamma, Model 5010, Perkin Elmer, MA, USA). Unidirectional <sup>22</sup>Na<sup>+</sup> influx  $JNa_{in}^+$  (nmol g<sup>-1</sup> h<sup>-1</sup>) was calculated as:

$$JNa_{in}^+ = \frac{CPM}{SA \cdot t \cdot M}$$

where CPM (counts per minute) is the total radioactivity of one fish (n=1), SA is the specific media activity (CPM µmol<sup>-1</sup>), t is the time lapsed (h), and M is the mass of the fish (g).

The first series of fluxes investigated concentration dependent effects of 4',6-diamidino-2-phenylindole (DAPI) at 0, 0.01, 0.1, 1, 10, and 100 µM on Na<sup>+</sup> uptake. Since DAPI had not been used in adult zebrafish previously, we needed to determine the effective dose required. The dose-response study was performed only in zebrafish acclimated to low Na<sup>+</sup> media, since preliminary Na<sup>+</sup> flux experiments showed insensitivity to DAPI in zebrafish acclimated to ultra-low Na<sup>+</sup> media. The second series of fluxes investigated the effect of amiloride (200 µM), an inhibitor of NHE, ENaC and ASICs (Kleyman and Cragoe, 1988; Paukert et al., 2004), ethyl-iso-propyl-amiloride (EIPA; 100 µM), an inhibitor with high affinity for NHE but not Na<sup>+</sup> channels (Kleyman and Cragoe, 1988), and 4',6-diamidino-2-phenylindole (DAPI; 10 µM) an inhibitor of ASICs but not ENaCs (Chen et al., 2010) on

Na<sup>+</sup> uptake in zebrafish acclimated to either ultra-low or low Na<sup>+</sup> water. All pharmacological agents were dissolved in 0.1% dimethyl sulfoxide (DMSO) and for the control group only 0.1% DMSO was used.

### **Immunoprecipitation and Western blot**

An anti-zebrafish ASIC4.2 antibody was generated as described previously ((Dymowska et al., 2014)). Immunoreactivity of anti-ASIC4.2 antibody in zebrafish was validated using immunoprecipitation (IP) technique according to the protocol used in our previous study (Dymowska et al., 2014). Briefly, whole gill baskets were dissected out of adult zebrafish, washed in ice-cold PBS, and cells lysed in 1ml of IP buffer containing 1% Triton-X for 30 min. The whole lysate was incubated with 4 µl of anti-ASIC4.2 antibody at 4°C over night with agitation. Following the incubation, 60 µl of pre-swelled and pre-blocked protein A-Sepharose CL4b beads (Sigma Chemical Co., St. Louis, MO) were added to the lysate and incubated for 6h on a rotator. After that, the samples were briefly centrifuged, and the supernatant was removed and the beads were washed 3 times with 1ml of the IP buffer. Washed beads were incubated with 35µl Laemmli buffer for 15 min at 65°C, centrifuged and the supernatant retained for Western blot analysis as described previously (Dymowska et al., 2014). Briefly, the samples were separated on a 7.5% polyacrylamide mini-gel, transferred to a nitrocellulose membrane, blocked in 5% skim milk in Tris-buffered saline containing Triton X-100 (0.2%) (TBST) and incubated with anti-ASIC4.2 antibody (1:1000) on a rocker at 4°C overnight. Subsequently, the membrane was washed, blocked again with 5% skim milk in TBST and incubated for 1h at room temperature with a secondary horseradish peroxidase-conjugated goat anti-rabbit antibody (1:10,000; Santa Cruz Biotechnology, Dallas, TX). After that, the membrane was washed and immunoreactive bands were visualized with SuperSignal West Pico Chemiluminescence Substrate kit (Thermoscientific) according to the manufacturer's protocol.

### **Immunohistochemistry**

Gills of zebrafish acclimatized to high Na<sup>+</sup> (Table 1) were examined for the presence of ASIC4.2, V-type H<sup>+</sup>-ATPase (VHA), and Na<sup>+</sup>/K<sup>+</sup>-ATPase. Zebrafish were euthanized by an overdose of MS-222 (1g/l), and the second and third gill arch was removed from the gill basket, fixed in 4% paraformaldehyde in PBS (pH=7.4) overnight at 4°, embedded in paraffin blocks, and processed for immunochemistry as described previously (Dymowska et al., 2014). Briefly, serial sections (4µm) were cut, rehydrated and incubated for 1h in 10 mM citrate

buffer at 70°C for epitope retrieval. For co-localization of ASIC4.2 and NKA, sections were incubated with the anti-ASIC4.2 polyclonal antibody (1:250) and anti-NKA monoclonal antibody (1:250; Developmental Studies Hybridoma Bank, University of Iowa) over night, followed by 1h incubation with TRITC conjugated anti-rabbit (1:500; Invitrogen, Oregon, USA) and FITC conjugated anti-mouse (1:500; Invitrogen, Oregon, USA) secondary antibodies. To analyse co-localization of ASIC4.2 with VHA, consecutive sections were incubated over night with either anti-ASIC4.2 antibody as described above or anti-VHA antibody (1:300; kindly donated by Dr. Steve Perry, University of Ottawa), since both polyclonal antibodies were raised in the same host. Subsequently, sections were incubated for 1h with secondary TRITC conjugated anti-rabbit antibody (1:500; Invitrogen, Oregon, USA) and sections stained with anti-ASIC4.2 were compared with consecutive sections stained with anti-VHA in order to determine co-localization. All slides were analysed with a laser scanning confocal microscope (Zeiss LSM 710, Germany) at the Cross Cancer Institute Cell Imaging Facility, Edmonton, Alberta. Obtained images were processed with LSM Image Browser (v. 4.2.0.121; Carl Zeiss) and Adobe Photoshop software.

### **Reverse-transcription polymerase chain reaction (RT-PCR)**

Total RNA was isolated from zebrafish gill tissues using TRIzol® reagent (Invitrogen, Carlsbad, CA, USA) according to the manufacturer's instructions. Following the isolation, RNA was treated with DNase I (Ambion, Austin, TX, USA) in order to remove genomic DNA and further purified with an on-column cleanup using RNeasy Mini Kit (Qiagen, Mississauga, ON, Canada). The quality of the RNA was then assessed by visualization on a formaldehyde gel and the concentration was measured with a NanoDrop® ND-1000 UV-vis Spectrophotometer (NanoDrop Technologies, Rockland, DE, USA). First strand cDNA was synthesized from 1µg of RNA using SuperScript III Reverse Transcriptase (Invitrogen) according to protocols provided by the manufacturer. Gene specific primers for zebrafish *asic1.1*, *1.2*, *1.3*, *2*, *4.1*, and *4.2* were designed with PrimerQuest (Table 2). PCR was performed with Phusion polymerase (New England Biolabs, MA, USA) under the following conditions: 98°C for 1 min of initial denaturation followed by 35 cycles of denaturation at 98°C for 10s, annealing at 63°C for 30s, elongation at 72°C for 40s, and with a final elongation at 72°C for 10min. PCR products were visualized by 1% agarose gel electrophoresis followed by ethidium bromide staining.

## STATISTICAL ANALYSIS

Data are reported as means  $\pm$  s.e.m. For Na<sup>+</sup> flux data one-way ANOVA and post-hoc comparison with Tukey test was performed (SigmaPlot version 11, Systat, Chicago, IL, USA).

## FUNDING

This study was supported by and NSERC Discovery Grant to GGG and Alberta Ingenuity student scholarship to AKD.

## ACKNOWLEDGEMENTS

The authors would like to thank the staff in the Aquatic Facility in the Biological Sciences Building and the Cross Cancer Institute Cell Imaging Facility at the University of Alberta. James Ede is thanked for assistance with confocal microscopy. Dr. Steve Perry (University of Ottawa) is thanked for the kind gift of VHA antibody.

## List of symbols and abbreviations

|          |                                              |
|----------|----------------------------------------------|
| ASIC     | acid-sensing sodium channel                  |
| MRC      | mitochondrion-rich cell                      |
| NHE      | Na <sup>+</sup> /H <sup>+</sup> exchanger    |
| Rh       | Rhesus                                       |
| VHA      | vacuolar-type H <sup>+</sup> -ATPase         |
| ENaC/DEG | epithelial Na <sup>+</sup> channel/degenerin |
| NKA      | Na <sup>+</sup> /K <sup>+</sup> -ATPase      |
| DAPI     | 4', 6-diamidino-2-phenylindole               |
| HR       | VHA-rich                                     |

|      |                                                 |
|------|-------------------------------------------------|
| NaR  | NKA-rich                                        |
| NCC  | Na <sup>+</sup> /Cl <sup>-</sup> co-transporter |
| KS   | K <sup>+</sup> -secreting                       |
| EIPA | ethyl-iso-propyl-amiloride                      |
| SIET | scanning ion-selective technique                |
| RO   | reverse osmosis                                 |
| DMSO | dimethyl sulfoxide                              |

## REFERENCES

- Avella, M. and Bornancin, M.** (1989). A new analysis of ammonia and sodium transport through the gills of the fresh water rainbow trout (*Salmo gairdneri*). *J. Exp. Biol.* **142**, 155-175.
- Babini, E., Paukert, M., Geisler, H. S. and Grunder, S.** (2002). Alternative splicing and interaction with di- and polyvalent cations control the dynamic range of acid-sensing ion channel 1 (ASIC1). *J. Biol. Chem.* **277**, 41597-41603.
- Boisen, A. M., Amstrup, J., Novak, I. and Grosell, M.** (2003). Sodium and chloride transport in soft water and hard water acclimated zebrafish (*Danio rerio*). *Biochim. Biophys. Acta* **1618**, 207-18.
- Bonifacio, G., Lelli, C. I. S. and Kellenberger, S.** (2014). Protonation controls ASIC1a activity via coordinated movements in multiple domains. *J. Gen. Physiol.* **143**, 105-118.
- Bradshaw, J. C., Kumai, Y. and Perry, S. F.** (2012). The effects of gill remodeling on transepithelial sodium fluxes and the distribution of presumptive sodium-transporting ionocytes in goldfish (*Carassius auratus*). *J. Comp. Physiol. B* **182**, 351-66.

**Bury, N. R. and Wood, C. M.** (1999). Mechanism of branchial apical silver uptake by rainbow trout is via the proton-coupled Na<sup>+</sup> channel. *Am. J. Physiol.* **277**, R1385-91.

**Chang, W. J., Horng, J. L., Yan, J. J., Hsiao, C. D. and Hwang, P. P.** (2009). The transcription factor, glial cell missing 2, is involved in differentiation and functional regulation of H<sup>+</sup>-ATPase-rich cells in zebrafish (*Danio rerio*). *Am. J. Physiol. Regul. Integr. Comp. Physiol.* **296**, R1192-201.

**Chang, W. J., Wang, Y. F., Hu, H. J., Wang, J. H., Lee, T. H. and Hwang, P. P.** (2013). Compensatory regulation of Na<sup>+</sup> absorption by Na<sup>+</sup>/H<sup>+</sup> exchanger and Na<sup>+</sup>-Cl<sup>-</sup> cotransporter in zebrafish (*Danio rerio*). *Front. Zool.* **10**.

**Chen, X., Qiu, L., Li, M., Durnagel, S., Orser, B. A., Xiong, Z. G. and MacDonald, J. F.** (2010). Diarylamidines: high potency inhibitors of acid-sensing ion channels. *Neuropharmacology* **58**, 1045-53.

**Chen, X. M., Polleichtner, G., Kadurin, I. and Grunder, S.** (2007). Zebrafish acid-sensing ion channel (ASIC) 4, characterization of homo- and heteromeric channels, and identification of regions important for activation by H<sup>+</sup>. *J. Biol. Chem.* **282**, 30406-30413.

**Dymowska, A. K., Hwang, P. P. and Goss, G. G.** (2012). Structure and function of ionocytes in the freshwater fish gill. *Respir. Physiol. Neurobiol.* **184**, 282-92.

**Dymowska, A. K., Schultz, A. G., Blair, S. D., Chamot, D. and Goss, G. G.** (2014). Acid-sensing ion channels (ASICs) are involved in epithelial Na<sup>+</sup> uptake in rainbow trout (*Oncorhynchus mykiss*). *Am. J. Physiol. Cell Physiol.* **307**, C255-C265.

**Esaki, M., Hoshijima, K., Kobayashi, S., Fukuda, H., Kawakami, K. and Hirose, S.** (2007). Visualization in zebrafish larvae of Na<sup>+</sup> uptake in mitochondria-rich cells whose differentiation is dependent on foxi3a. *Am. J. Physiol. Regul. Integr. Comp. Physiol.* **292**, R470-80.



**Evans, D. H., Piermarini, P. M. and Choe, K. P.** (2005). The multifunctional fish gill: Dominant site of gas exchange, osmoregulation, acid-base regulation, and excretion of nitrogenous waste. *Physiol. Rev.* **85**, 97-177.

**Goss, G., Gilmour, K., Hawkings, G., Brumbach, J. H., Huynh, M. and Galvez, F.** (2011). Mechanism of sodium uptake in PNA negative MR cells from rainbow trout, *Oncorhynchus mykiss* as revealed by silver and copper inhibition. *J. Comp. Physiol. A* **159**, 234-241.

**Grunder, S., Geissler, H. S., Bassler, E. L. and Ruppersberg, J. P.** (2000). A new member of acid-sensing ion channels from pituitary gland. *Neuroreport* **11**, 1607-1611.

**Hirata, T., Kaneko, T., Ono, T., Nakazato, T., Furukawa, N., Hasegawa, S., Wakabayashi, S., Shigekawa, M., Chang, M. H., Romero, M. F. and Hirose, S.** (2003). Mechanism of acid adaptation of a fish living in a pH 3.5 lake. *Am. J. Physiol. Regul. Integr. Comp. Physiol.* **284**, R1199-R1212.

**Horng, J. L., Lin, L. Y., Huang, C. J., Katoh, F., Kaneko, T. and Hwang, P. P.** (2007). Knockdown of V-ATPase subunit A (*atp6v1a*) impairs acid secretion and ion balance in zebrafish (*Danio rerio*). *Am. J. Physiol. Regul. Integr. Comp. Physiol.* **292**, R2068-R2076.

**Hwang, P. P.** (2009). Ion uptake and acid secretion in zebrafish (*Danio rerio*). *J. Exp. Biol.* **212**, 1745-52.

**Hwang, P. P. and Lee, T. H.** (2007). New insights into fish ion regulation and mitochondrion-rich cells. *Comp. Biochem. Physiol. A* **148**, 479-97.

**Hwang, P. P., Lee, T. H. and Lin, L. Y.** (2011). Ion regulation in fish gills: recent progress in the cellular and molecular mechanisms. *Am. J. Physiol. Regul. Integr. Comp. Physiol.* **301**, R28-47.

**Immke, D. C. and McCleskey, E. W.** (2003). Protons open acid-sensing ion channels by catalyzing relief of Ca<sup>2+</sup> blockade. *Neuron* **37**, 75-84.

**Ito, Y., Kato, A., Hirata, T., Hirose, S. and Romero, M. F.** (2014).  $\text{Na}^+/\text{H}^+$  and  $\text{Na}^+/\text{NH}_4^+$  exchange activities of zebrafish NHE3b expressed in *Xenopus* oocytes. *Am. J. Physiol. Regul. Integr. Comp. Physiol.* **306**, R315-R327.

**Jasti, J., Furukawa, H., Gonzales, E. B. and Gouaux, E.** (2007). Structure of acid-sensing ion channel 1 at 1.9Å resolution and low pH. *Nature* **449**, 316-323.

**Kleyman, T. R. and Cragoe, E. J.** (1988). Amiloride and its analogs as tools in the study of ion transport. *J. Membrane Biol.* **105**, 1-21.

**Kumai, Y. and Perry, S. F.** (2011). Ammonia excretion via Rhcg1 facilitates  $\text{Na}^+$  uptake in larval zebrafish, *Danio rerio*, in acidic water. *Am. J. Physiol. Regul. Integr. Comp. Physiol.* **301**, R1517-R1528.

**Kwong, R. W. M. and Perry, S. F.** (2013). The tight junction protein claudin-b regulates epithelial permeability and sodium handling in larval zebrafish, *Danio rerio*. *Am. J. Physiol. Regul. Integr. Comp. Physiol.* **304**, R504-R513.

**Lawrence, C.** (2011). Advances in Zebrafish Husbandry and Management. *Methods Cell Biol.* **104**, 431-451.

**Levanti, M. B., Guerrera, M. C., Calavia, M. G., Ciriaco, E., Montalbano, G., Cobo, J., Germana, A. and Vega, J. A.** (2011). Acid-sensing ion channel 2 (ASIC2) in the intestine of adult zebrafish. *Neurosci. Lett.* **494**, 24-28.

**Lin, L. Y., Horng, J. L., Kunkel, J. G. and Hwang, P. P.** (2006). Proton pump-rich cell secretes acid in skin of zebrafish larvae. *Am. J. Physiol. Cell. Physiol.* **290**, C371-C378.

**Nakada, T., Hoshijima, K., Esaki, M., Nagayoshi, S., Kawakami, K. and Hirose, S.** (2007). Localization of ammonia transporter Rhcg1 in mitochondrion-rich cells of yolk sac, gill, and kidney of zebrafish and its ionic strength-dependent expression. *Am. J. Physiol. Regul. Integr. Comp. Physiol.* **293**, R1743-53.

**Nawata, C. M., Hung, C. C., Tsui, T. K., Wilson, J. M., Wright, P. A. and Wood, C. M.** (2007). Ammonia excretion in rainbow trout (*Oncorhynchus mykiss*): evidence for Rh glycoprotein and H<sup>+</sup>-ATPase involvement. *Physiol. Genomics* **31**, 463-74.

**Parks, S. K., Tresguerres, M. and Goss, G. G.** (2008). Theoretical considerations underlying Na<sup>+</sup> uptake mechanisms in freshwater fishes. *Comp. Biochem. Physiol. C* **148**, 411-418.

**Paukert, M., Chen, X. M., Polleichtner, G., Schindelin, H. and Grunder, S.** (2008). Candidate amino acids involved in H<sup>+</sup> gating of acid-sensing ion channel 1a. *J. Biol. Chem.* **283**, 572-581.

**Paukert, M., Sidi, S., Russell, C., Siba, M., Wilson, S. W., Nicolson, T. and Grunder, S.** (2004). A family of acid-sensing ion channels from the zebrafish - Widespread expression in the central nervous system suggests a conserved role in neuronal communication. *J. Biol. Chem.* **279**, 18783-18791.

**Reid, S. D., Hawkings, G. S., Galvez, F. and Goss, G. G.** (2003). Localization and characterization of phenamil-sensitive Na<sup>+</sup> influx in isolated rainbow trout gill epithelial cells. *J. Exp. Biol.* **206**, 551-559.

**Sakai, H., Lingueglia, E., Champigny, G., Mattei, M. G. and Lazdunski, M.** (1999). Cloning and functional expression of a novel degenerin-like Na<sup>+</sup> channel gene in mammals. *J. Physiol.* **519**, 323-33.

**Shih, T. H., Horng, J. L., Liu, S. T., Hwang, P. P. and Lin, L. Y.** (2012a). Rhcg1 and NHE3b are involved in ammonium-dependent sodium uptake by zebrafish larvae acclimated to low-sodium water. *Am. J. Physiol. Regul. Integr. Comp. Physiol.* **302**, R84-R93.

**Shih, T. H., Horng, J. L., Liu, S. T., Hwang, P. P. and Lin, L. Y.** (2012b). Rhcg1 and NHE3b are involved in ammonium-dependent sodium uptake by zebrafish larvae acclimated to low-sodium water. *Am. J. Physiol. Regul. Integr. Comp. Physiol.* **302**, R84-R93.

**Sullivan, G. V., Fryer, J. N. and Perry, S. F.** (1995). Immunolocalization of proton pumps ( $H^+$ -ATPase) in pavement cells of rainbow trout gill. *J. Exp. Biol.* **198**, 2619-2629.

**Vina, E., Parisi, V., Cabo, R., Laura, R., Lopez-Velasco, S., Lopez-Muniz, A., Garcia-Suarez, O., Germana, A. and Vega, J. A.** (2013). Acid-sensing ion channels (ASICs) in the taste buds of adult zebrafish. *Neurosci. Lett.* **536**, 35-40.

**Waldmann, R. and Lazdunski, M.** (1998).  $H^+$ -gated cation channels: neuronal acid sensors in the ENaC/DEG family of ion channels. *Curr. Opin. Neurobiol* **8**, 418-24.

**Wilson, J. M., Laurent, P., Tufts, B. L., Benos, D. J., Donowitz, M., Vogl, A. W. and Randall, D. J.** (2000). NaCl uptake by the branchial epithelium in freshwater teleost fish: an immunological approach to ion-transport protein localization. *J. Exp. Biol.* **203**, 2279-2296.

**Wright, P. A. and Wood, C. M.** (2009). A new paradigm for ammonia excretion in aquatic animals: role of Rhesus (Rh) glycoproteins. *J. Exp. Biol.* **212**, 2303-2312.

**Yan, J. J., Chou, M. Y., Kaneko, T. and Hwang, P. P.** (2007). Gene expression of  $Na^+/H^+$  exchanger in zebrafish  $H^+$ -ATPase-rich cells during acclimation to low- $Na^+$  and acidic environments. *Am. J. Physiol. Cell Physiol.* **293**, C1814-C1823.

**Zhang, P., Sigworth, F. J. and Canessa, C. M.** (2006). Gating of acid-sensin ion channel-1: release of  $Ca^{2+}$  block vs. allosteric mechanism. *J. Gen. Physiol.* **127**, 109-117.

## Figures and tables

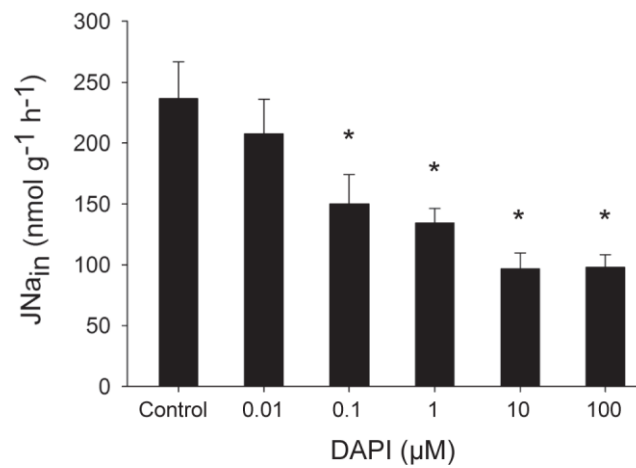

Figure 1. The effect of DAPI on Na<sup>+</sup> uptake rates in adult zebrafish acclimated to low Na<sup>+</sup> media (~500 μM). Values are mean ± s.e.m. (n=6). \* Significantly different from the control group ( $P < 0.05$ ).

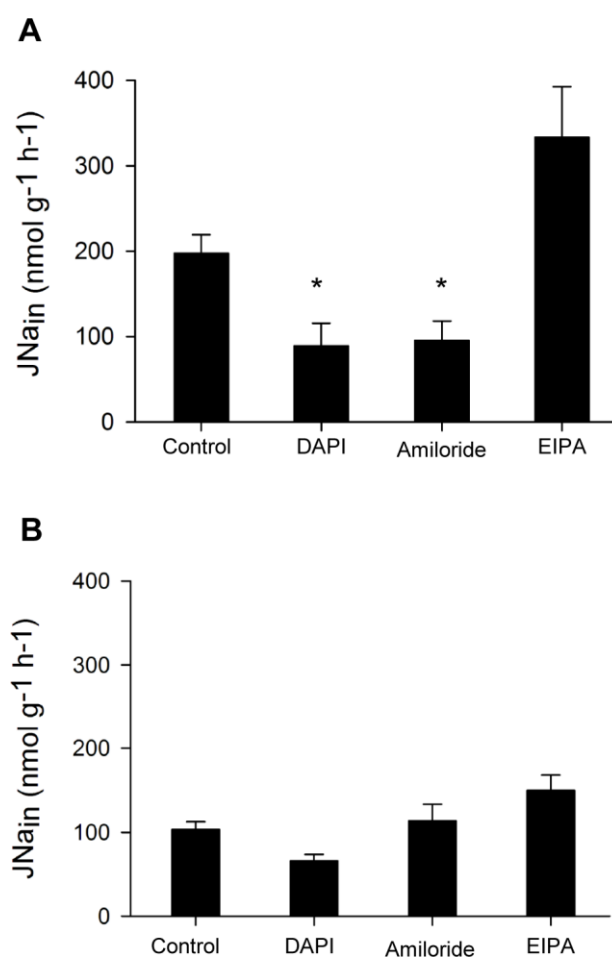

Figure 2. The effect of DAPI (10  $\mu$ M), amiloride (200  $\mu$ M), and EIPA (100  $\mu$ M) on Na<sup>+</sup> uptake rates in adult zebrafish acclimated to A) low Na<sup>+</sup> media (~500  $\mu$ M), and B) ultra-low Na<sup>+</sup> media (~50  $\mu$ M). Na<sup>+</sup> uptake rates were measured in the respective acclimation media. Values are mean  $\pm$  s.e.m. (n=6). \* Significantly different from the control group ( $P < 0.05$ ).

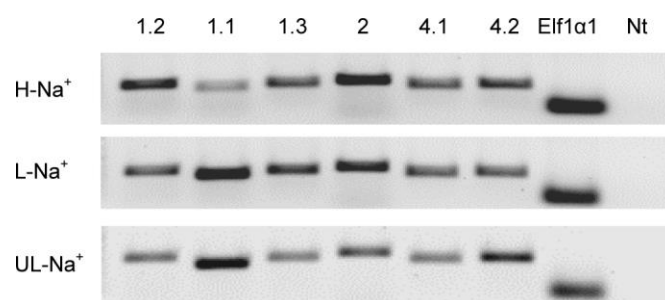

Figure 3. RT-PCR analysis of the expression of ASICs family subunits in the gills of adult zebrafish acclimated to high Na<sup>+</sup> (~1200 μM), low Na<sup>+</sup> (~ 500 μM), and ultra-low Na<sup>+</sup> (50 μM) media. Elf1α1 – zebrafish elongation factor used as a positive control, Nt – no template. Details of primers used and amplicon sizes are shown in Table 2.

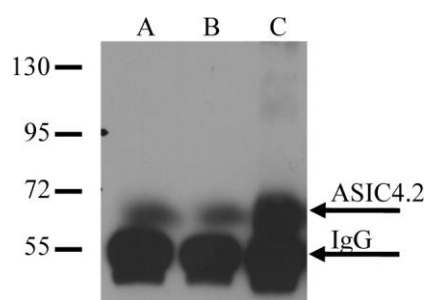

Figure 4. Immunoprecipitation Western blot analysis with anti-zASIC4.2 antibody of whole gill homogenates from zebrafish acclimated to high Na<sup>+</sup> media (~1400 μM) . Lanes A and B are gill homogenates from one individual fish, lane C is pooled sample of gill homogenates from two fish. IgG – rabbit immunoglobulin G.

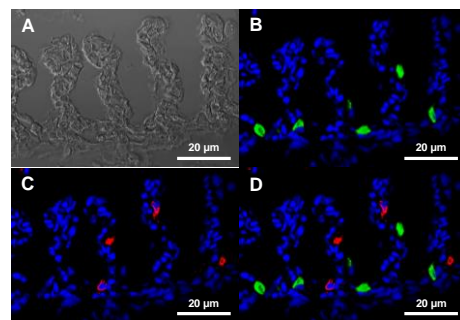

Figure 5. Double immunostaining with anti-Na<sup>+</sup>/K<sup>+</sup>-ATPase ( $\alpha 5$ ) antibody and anti-ASIC4.2 antibody in zebrafish gill. A) Bright field, B) anti-Na<sup>+</sup>/K<sup>+</sup>-ATPase (green), C) anti-ASIC4.2 (red), D) merged A) and B).



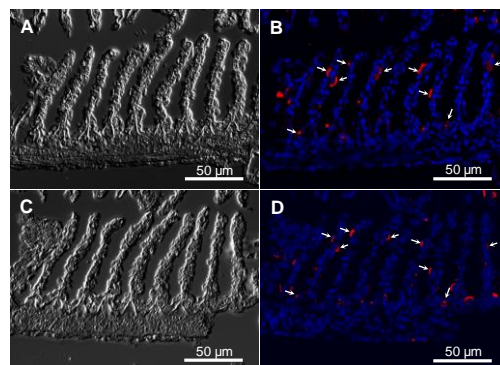

Figure 6. Immunostaining with anti-ASIC4.2 antibody and anti-V-H<sup>+</sup>-ATPase antibody in consecutive sections (4μm) of zebrafish gill. A) and C) Bright field, B) anti-ASIC4.2 , D) anti-V-H<sup>+</sup>-ATPase. Arrows indicate overlapping cells.

Table 1. Ion composition and pH of the exposure media.

|                               | Concentration ( $\mu\text{M}$ ) |                 |                  | pH  |
|-------------------------------|---------------------------------|-----------------|------------------|-----|
|                               | $\text{Na}^+$                   | $\text{Cl}^-$   | $\text{Ca}^{2+}$ |     |
| Ultra-low $\text{Na}^+$       | 49.5 $\pm$ 0.5                  | 64 $\pm$ 1      | 308 $\pm$ 15     | 6   |
| Low $\text{Na}^+$ (tap water) | 511 $\pm$ 25                    | 304 $\pm$ 32.5  | 1179 $\pm$ 30    | 8.5 |
| High $\text{Na}^+$            | 1420 $\pm$ 28                   | 1051 $\pm$ 35.5 | 425 $\pm$ 31     | 7   |

Table 2. Gene specific primers used for RT-PCR.

| Gene           | Primer sequence (5'-3')                                    | Accession number | Amplicon (bp) |
|----------------|------------------------------------------------------------|------------------|---------------|
| <i>asic1.1</i> | F: AACCCAGACGTCAAAGGAACGCTA<br>R: AAGACAGTTTCGAGCCGTCGCTAT | AJ609615         | 264           |
| <i>asic1.2</i> | F: TCATTGGAGCCAGTATTCTTACC<br>R: GAGAGAGAACAACCACGAGATG    | AJ609616         | 312           |
| <i>asic1.3</i> | F: CACACCTGAGCAGTACAAAGA<br>R: CCACCGATATCACCAAGTAACC      | AJ609617         | 300           |
| <i>asic2</i>   | F: GGAAAGCAGATGCTTGTGGACCT<br>R: AGCAGCCAATTGAGATGCGGAAAC  | AJ609618         | 339           |
| <i>asic4.1</i> | F: AACACCATCCTCCCGAATCACCAT<br>R: AGTCCTGCGAAAGGAGTTGGGAAA | AJ609619         | 305           |
| <i>asic4.2</i> | F: CCAGGAACAGAGGCTAACATA<br>R: CCATAGAGAGCTCTTTCCCATAC     | AJ609620         | 305           |
| <i>elf1a1</i>  | F: GGGTCTGTCCGTTCTTGGAG<br>R: TTCTCAGGCTGACTGTGCTG         | NM_131263        | 83            |
